# Supplementary material
Source: MDPI journal article supplement (https://www.mdpi.com/2673-5318/2/3/24)
Supplement: s1 [file s1]

## Supplementary data

**Table S1:** Univariate logistic regression analysis of aspects of psychopathological assessment in patients presenting in the emergency according to legal status

| Aspect of PPA                          | All Patients |       | Involuntary |       | Voluntary |       | chi    | df | p      | Univariate Logistic Regression |          |          |        |
|----------------------------------------|--------------|-------|-------------|-------|-----------|-------|--------|----|--------|--------------------------------|----------|----------|--------|
|                                        | 597          | %     | 118         | %     | 479       | %     |        |    |        | Exp(B)                         | LL       | UL       | p      |
| General physical appearance            |              |       |             |       |           |       |        |    |        |                                |          |          |        |
| Unkempt                                | 76           | 12.7% | 26          | 22.0% | 50        | 10.4% | 11.458 | 1  | <0.001 | 2.503                          | 1.488    | 4.211    | <0.001 |
| Inappropriate attire                   | 30           | 5.0%  | 15          | 12.7% | 15        | 3.1%  | 18.207 | 1  | <0.001 | 4.349                          | 2.062    | 9.172    | <0.001 |
| Consciousness                          |              |       |             |       |           |       |        |    |        |                                |          |          |        |
| Disorder of consciousness              | 19           | 3.2%  | 12          | 10.2% | 7         | 1.5%  | 35.552 | 1  | <0.001 |                                |          |          |        |
| Disturbances of orientation            |              |       |             |       |           |       |        |    |        |                                |          |          |        |
| Any disturbance of disorientation      | 92           | 15.4% | 45          | 38.1% | 47        | 9.8%  | 58.265 | 1  | <0.001 | 6.855                          | 4.208    | 11.165   | <0.001 |
| Disorientation of time                 | 76           | 12.7% | 35          | 29.7% | 41        | 8.6%  | 37.946 | 1  | <0.001 | 5.028                          | 3.005    | 8.414    | <0.001 |
| Disorientation of place                | 42           | 7.0%  | 28          | 23.7% | 14        | 2.9%  | 62.666 | 1  | <0.001 | 11.425                         | 5.764    | 22.644   | <0.001 |
| Disorientation of situation            | 55           | 9.2%  | 34          | 28.8% | 21        | 4.4%  | 67.555 | 1  | <0.001 | 10.812                         | 5.919    | 19.749   | <0.001 |
| Disorientation of person               | 11           | 1.8%  | 7           | 5.9%  | 4         | 0.8%  | 13.600 | 1  | <0.001 |                                |          |          |        |
| Impairment of cognition                |              |       |             |       |           |       |        |    |        |                                |          |          |        |
| Any cognitive impairment               | 439          | 73.5% | 97          | 82.2% | 342       | 71.4% | 5.679  | 1  | 0.017  | 6.391                          | 2.737    | 14.927   | <0.001 |
| Disturbed attention                    | 342          | 57.3% | 85          | 72.0% | 257       | 53.7% | 13.072 | 1  | <0.001 | 3.669                          | 2.206    | 6.101    | <0.001 |
| Disturbed concentration                | 436          | 73.0% | 98          | 83.1% | 338       | 70.6% | 7.496  | 1  | 0.006  | 4.589                          | 2.256    | 9.337    | <0.001 |
| Disturbed memory function              | 124          | 20.8% | 37          | 31.4% | 87        | 18.2% | 10.014 | 1  | 0.002  | 2.489                          | 1.57     | 3.945    | <0.001 |
| Formal thought disorders               |              |       |             |       |           |       |        |    |        |                                |          |          |        |
| Any formal thought disorder            | 503          | 84.3% | 106         | 89.8% | 397       | 82.9% | 3.447  | 1  | 0.063  | 5.207                          | 1.864    | 14.546   | 0.002  |
| Accelerated thinking                   | 92           | 15.4% | 18          | 15.3% | 74        | 15.4% | 1.088  | 1  | 0.297  |                                |          |          |        |
| Inhibited/retarded thinking            | 128          | 21.4% | 25          | 21.2% | 103       | 21.5% | 0.003  | 1  | 0.956  |                                |          |          |        |
| Circumstantial thinking                | 110          | 18.4% | 17          | 14.4% | 93        | 19.4% | 1.580  | 1  | 0.209  | 0.783                          | 0.45     | 1.36     | 0.385  |
| Restricted thinking                    | 126          | 21.1% | 7           | 5.9%  | 119       | 24.8% | 20.335 | 1  | <0.001 | 0.229                          | 0.108    | 0.483    | <0.001 |
| Rumination                             | 38           | 6.4%  | 3           | 2.5%  | 35        | 7.3%  | 3.606  | 1  | 0.058  | 0.341                          | 0.103    | 1.128    | 0.078  |
| Rambling                               | 79           | 13.2% | 18          | 15.3% | 61        | 12.7% | 0.523  | 1  | 0.470  | 1.277                          | 0.721    | 2.26     | 0.402  |
| Tangential thinking                    | 81           | 13.6% | 35          | 29.7% | 46        | 9.6%  | 32.480 | 1  | <0.001 | 3.892                          | 2.355    | 6.432    | <0.001 |
| Thought blocking/disruption of thought | 29           | 4.9%  | 7           | 5.9%  | 22        | 4.6%  | 0.367  | 1  | 0.545  | 1.956                          | 0.866    | 4.419    | 0.107  |
| Incoherence/derailment                 | 185          | 31.0% | 63          | 53.4% | 122       | 25.5% | 34.511 | 1  | <0.001 | 3.789                          | 2.476    | 5.799    | <0.001 |
| Neologisms                             | 5            | 0.8%  | 3           | 2.5%  | 2         | 0.4%  | 5.147  | 1  | 0.023  |                                |          |          |        |
| Worries and compulsions                |              |       |             |       |           |       |        |    |        |                                |          |          |        |
| Any worry or compulsion                | 335          | 56.1% | 49          | 41.5% | 286       | 59.7% | 12.710 | 1  | <0.001 | 0.531                          | 0.349315 | 0.806691 | 0.003  |

| Aspect of PPA                      | All Patients |       | Involuntary |       | Voluntary |       | chi    | df | p      | Univariate Logistic Regression |       |        |        |
|------------------------------------|--------------|-------|-------------|-------|-----------|-------|--------|----|--------|--------------------------------|-------|--------|--------|
|                                    | 597          | %     | 118         | %     | 479       | %     |        |    |        | Exp(B)                         | LL    | UL     | p      |
| Suspiciousness                     | 151          | 25.3% | 46          | 39.0% | 105       | 21.9% | 14.587 | 1  | <0.001 | 2.337                          | 1.518 | 3.597  | <0.001 |
| Hypochondriasis                    | 4            | 0.7%  | 1           | 0.8%  | 3         | 0.6%  | 0.070  | 1  | 0.791  |                                |       |        |        |
| Phobias                            | 5            | 0.8%  | 0           | 0.0%  | 5         | 1.0%  | 1.247  | 1  | 0.264  |                                |       |        |        |
| Compulsions                        | 11           | 1.8%  | 1           | 0.8%  | 10        | 2.1%  | 0.805  | 1  | 0.370  |                                |       |        |        |
| Fears                              | 255          | 42.7% | 17          | 14.4% | 238       | 49.7% | 48.160 | 1  | <0.001 | 0.189                          | 0.11  | 0.322  | <0.001 |
| <b>Delusions</b>                   |              |       |             |       |           |       |        |    |        |                                |       |        |        |
| Any delusion                       | 520          | 87.1% | 104         | 88.1% | 416       | 86.8% | 0.140  | 1  | 0.709  | 2.665                          | 1.122 | 6.329  | 0.026  |
| Delusions of reference             | 114          | 19.1% | 19          | 16.1% | 95        | 19.8% | 0.853  | 1  | 0.356  | 0.736                          | 0.424 | 1.278  | 0.276  |
| Delusions of persecution           | 376          | 63.0% | 64          | 54.2% | 312       | 65.1% | 4.823  | 1  | 0.028  | 0.727                          | 0.479 | 1.104  | 0.135  |
| Delusions of impoverishment        | 9            | 1.5%  | 1           | 0.8%  | 8         | 1.7%  | 0.432  | 1  | 0.511  |                                |       |        |        |
| Nihilistic delusions               | 5            | 0.8%  | 0           | 0.0%  | 5         | 1.0%  | 1.242  | 1  | 0.265  |                                |       |        |        |
| Delusions of guilt                 | 26           | 4.4%  | 6           | 5.1%  | 20        | 4.2%  | 0.188  | 1  | 0.665  | 1.303                          | 0.511 | 3.324  | 0.580  |
| Hypochondriacal delusions          | 28           | 4.7%  | 1           | 0.8%  | 27        | 5.6%  | 4.858  | 1  | 0.028  | 0.146                          | 0.020 | 1.087  | 0.060  |
| Delusions of grandiosity           | 27           | 4.5%  | 10          | 8.5%  | 17        | 3.5%  | 5.319  | 1  | 0.021  | 2.579                          | 1.148 | 5.576  | 0.022  |
| Religious delusions                | 18           | 3.0%  | 4           | 3.4%  | 14        | 2.9%  | 0.071  | 1  | 0.790  | 1.181                          | 0.382 | 3.659  | 0.772  |
| Systemized delusions               | 24           | 4.0%  | 7           | 5.9%  | 17        | 3.5%  | 1.394  | 1  | 0.238  | 1.755                          | 0.710 | 4.338  | 0.223  |
| Other delusional content           | 21           | 3.5%  | 8           | 6.8%  | 13        | 2.7%  | 4.611  | 1  | 0.032  | 2.671                          | 1.080 | 6.606  | 0.036  |
| Evidence of delusions              | 64           | 10.7% | 25          | 21.2% | 39        | 8.1%  | 16.832 | 1  | <0.001 | 3.174                          | 1.838 | 5.481  | <0.001 |
| Delusional mood                    | 8            | 1.3%  | 0           | 0.0%  | 8         | 1.7%  | 1.998  | 1  | 0.158  |                                |       |        |        |
| <b>Disorders of perception</b>     |              |       |             |       |           |       |        |    |        |                                |       |        |        |
| Any type of hallucination          | 325          | 54.4% | 58          | 49.2% | 267       | 55.7% | 1.657  | 1  | 0.198  | 0.850                          | 0.563 | 1.283  | 0.440  |
| Hearing voices                     | 165          | 27.6% | 17          | 14.4% | 148       | 30.9% | 12.874 | 1  | <0.001 | 0.389                          | 0.224 | 0.675  | <0.001 |
| Other auditory hallucinations      | 37           | 6.2%  | 8           | 6.8%  | 29        | 6.1%  | 0.086  | 1  | 0.769  | 1.375                          | 0.630 | 3.003  | 0.424  |
| Visual hallucinations              | 73           | 12.2% | 18          | 15.3% | 55        | 11.5% | 1.255  | 1  | 0.263  | 1.440                          | 0.809 | 2.564  | 0.215  |
| Bodily hallucinations              | 62           | 10.4% | 4           | 3.4%  | 58        | 12.1% | 7.733  | 1  | 0.005  | 0.263                          | 0.093 | 0.739  | 0.011  |
| Other hallucinations               | 14           | 2.3%  | 3           | 2.5%  | 11        | 2.3%  | 0.025  | 1  | 0.874  |                                |       |        |        |
| Pseudohallucinations               | 12           | 2.0%  | 1           | 0.8%  | 11        | 2.3%  | 1.009  | 1  | 0.315  |                                |       |        |        |
| Evidence of hallucinations         | 41           | 6.9%  | 23          | 19.5% | 18        | 3.8%  | 36.643 | 1  | <0.001 | 6.226                          | 3.232 | 11.992 | <0.001 |
| <b>Ego (Boundary) disturbances</b> |              |       |             |       |           |       |        |    |        |                                |       |        |        |
| Any ego disturbance                | 148          | 24.8% | 19          | 16.1% | 129       | 26.9% | 5.955  | 1  | 0.015  | 0.586                          | 0.347 | 0.99   | 0.046  |
| Depersonalization                  | 15           | 2.5%  | 2           | 1.7%  | 13        | 2.7%  | 0.401  | 1  | 0.527  |                                |       |        |        |
| Derealization                      | 23           | 3.9%  | 2           | 1.7%  | 21        | 4.4%  | 1.848  | 1  | 0.174  | 0.391                          | 0.09  | 1.694  | 0.210  |
| Thought echoing                    | 3            | 0.5%  | 3           | 2.5%  | 0         | 0.0%  | 12.239 | 1  | <0.001 |                                |       |        |        |
| Thought withdrawal                 | 4            | 0.7%  | 0           | 0.0%  | 4         | 0.8%  | 0.992  | 1  | 0.319  |                                |       |        |        |
| Thought broadcasting               | 27           | 4.5%  | 2           | 1.7%  | 25        | 5.2%  | 2.723  | 1  | 0.099  | 0.326                          | 0.076 | 1.396  | 0.131  |
| Thought insertion                  | 25           | 4.2%  | 6           | 5.1%  | 19        | 4.0%  | 0.295  | 1  | 0.587  | 1.353                          | 0.527 | 3.469  | 0.530  |
| Other feelings of alien influence  | 49           | 8.2%  | 5           | 4.2%  | 44        | 9.2%  | 3.077  | 1  | 0.079  | 0.566                          | 0.235 | 1.365  | 0.205  |
| <b>Disturbances of affect</b>      |              |       |             |       |           |       |        |    |        |                                |       |        |        |
| Any disturbance of affect          | 525          | 87.9% | 106         | 89.8% | 419       | 87.5% | 0.496  | 1  | 0.481  | 3.734                          | 1.326 | 10.516 | 0.013  |

| Aspect of PPA                                      | All Patients |       | Involuntary |       | Voluntary |       | chi     | df | p      | Univariate Logistic Regression |        |        |        |
|----------------------------------------------------|--------------|-------|-------------|-------|-----------|-------|---------|----|--------|--------------------------------|--------|--------|--------|
|                                                    | 597          | %     | 118         | %     | 479       | %     |         |    |        | Exp(B)                         | LL     | UL     | p      |
| Blunted affect                                     | 133          | 22.3% | 28          | 23.7% | 105       | 21.9% | 0.179   | 1  | 0.672  | 1.249                          | 0.781  | 1.996  | 0.353  |
| Perplexity                                         | 13           | 2.2%  | 2           | 1.7%  | 11        | 2.3%  | 0.161   | 1  | 0.688  |                                |        |        |        |
| Depressed mood                                     | 278          | 46.6% | 24          | 20.3% | 254       | 53.0% | 40.657  | 1  | <0.001 | 0.225                          | 0.139  | 0.365  | <0.001 |
| Hopelessness                                       | 26           | 4.4%  | 1           | 0.8%  | 25        | 5.2%  | 4.344   | 1  | 0.037  | 0.328                          | 0.076  | 1.409  | 0.134  |
| Anxiety                                            | 72           | 12.1% | 4           | 3.4%  | 68        | 14.2% | 10.425  | 1  | 0.001  | 0.21                           | 0.075  | 0.588  | 0.003  |
| Euphoria                                           | 25           | 4.2%  | 7           | 5.9%  | 18        | 3.8%  | 1.116   | 1  | 0.291  | 1.587                          | 0.647  | 3.892  | 0.313  |
| Dysphoria/irritability                             | 175          | 29.3% | 69          | 58.5% | 106       | 22.1% | 60.358  | 1  | <0.001 | 4.804                          | 3.146  | 7.335  | <0.001 |
| Inner restlessness                                 | 61           | 10.2% | 5           | 4.2%  | 56        | 11.7% | 5.734   | 1  | 0.017  | 0.263                          | 0.093  | 0.741  | 0.011  |
| Complaintiveness                                   | 15           | 2.5%  | 2           | 1.7%  | 13        | 2.7%  | 0.401   | 1  | 0.526  |                                |        |        |        |
| Feeling of loss of feeling                         | 4            | 0.7%  | 1           | 0.8%  | 3         | 0.6%  | 0.070   | 1  | 0.792  |                                |        |        |        |
| Feelings of inadequacy                             | 7            | 1.2%  | 1           | 0.8%  | 6         | 1.3%  | 0.134   | 1  | 0.714  |                                |        |        |        |
| Exaggerated self-esteem                            | 12           | 2.0%  | 2           | 1.7%  | 10        | 2.1%  | 0.074   | 1  | 0.786  |                                |        |        |        |
| Parathymia (incongruent affect)                    | 22           | 3.7%  | 9           | 7.6%  | 13        | 2.7%  | 6.439   | 1  | 0.011  | 2.962                          | 1.234  | 7.107  | 0.015  |
| Ambivalenz                                         | 52           | 8.7%  | 6           | 5.1%  | 46        | 9.6%  | 2.431   | 1  | 0.119  | 0.592                          | 0.26   | 1.348  | 0.212  |
| <b>Disorders of drive and psychomotor activity</b> |              |       |             |       |           |       |         |    |        |                                |        |        |        |
| Inhibition/lack of drive                           | 195          | 32.7% | 22          | 18.6% | 173       | 36.1% | 13.142  | 1  | <0.001 | 0.413                          | 0.253  | 0.676  | <0.001 |
| Increased drive                                    | 178          | 29.8% | 64          | 54.2% | 114       | 23.8% | 41.916  | 1  | <0.001 | 3.889                          | 2.566  | 5.895  | <0.001 |
| Motor restlessness                                 | 293          | 49.1% | 83          | 70.3% | 210       | 43.8% | 26.599  | 1  | <0.001 | 3.042                          | 1.979  | 4.676  | <0.001 |
| Motor retardation                                  | 61           | 10.2% | 13          | 11.0% | 48        | 10.0% | 0.102   | 1  | 0.749  | 1.073                          | 0.561  | 2.052  | 0.831  |
| Mannerisms/histrionics                             | 24           | 4.0%  | 7           | 5.9%  | 17        | 3.5%  | 1.394   | 1  | 0.238  | 2.035                          | 0.85   | 4.874  | 0.111  |
| Mutism/poverty of speech                           | 74           | 12.4% | 35          | 29.7% | 39        | 8.1%  | 40.374  | 1  | <0.001 | 5.596                          | 3.351  | 9.343  | <0.001 |
| Logorrhea/pressure of speech                       | 68           | 11.4% | 20          | 16.9% | 48        | 10.0% | 4.503   | 1  | 0.034  | 1.766                          | 1.004  | 3.106  | 0.049  |
| <b>Other disturbances</b>                          |              |       |             |       |           |       |         |    |        |                                |        |        |        |
| Social withdrawal                                  | 29           | 4.9%  | 3           | 2.5%  | 26        | 5.4%  | 1.706   | 1  | 0.192  | 0.44                           | 0.131  | 1.479  | 0.184  |
| Excessive social contact                           | 51           | 8.5%  | 26          | 22.0% | 25        | 5.2%  | 34.262  | 1  | <0.001 | 5.41                           | 2.99   | 9.789  | <0.001 |
| Aggressiveness                                     | 90           | 15.1% | 57          | 48.3% | 33        | 6.9%  | 126.845 | 1  | <0.001 | 12.384                         | 7.153  | 21.439 | <0.001 |
| Suicidal thoughts                                  | 139          | 23.3% | 28          | 23.7% | 111       | 23.2% | 0.016   | 1  | 0.899  | 1.081                          | 0.676  | 1.73   | 0.745  |
| Suicidal intent                                    | 34           | 5.7%  | 13          | 11.0% | 21        | 4.4%  | 7.755   | 1  | 0.005  | 2.677                          | 1.298  | 5.518  | 0.008  |
| Self-harm                                          | 21           | 3.5%  | 6           | 5.1%  | 15        | 3.1%  | 1.064   | 1  | 0.302  | 2.062                          | 0.813  | 5.23   | 0.127  |
| Lack of insight                                    | 153          | 25.6% | 90          | 76.3% | 63        | 13.2% | 197.895 | 1  | <0.001 | 22.857                         | 13.718 | 38.084 | <0.001 |
| Circadian disturbances                             | 97           | 16.2% | 17          | 14.4% | 80        | 16.7% | 0.366   | 1  | 0.545  | 1.066                          | 0.612  | 1,859  | 0.821  |
| Disturbances of sleep                              | 191          | 32.0% | 20          | 16.9% | 171       | 35.7% | 15.298  | 1  | <0.001 | 0.382                          | 0.226  | 0.646  | <0.001 |
